# Supplementary material for: Rab1 recruits WHAMM during membrane remodeling but limits actin nucleation
Source: PubMed Central journal article supplement — Mol Biol Cell. 2016 Mar 15;27(6):967–78. doi: 10.1091/mbc.E15-07-0508 (PMC4791140; doi:10.1091/mbc.e15-07-0508), 2016-03-15
Supplement: supp_E15-07-0508v1_CombinedSupMats.pdf [file supp_E15-07-0508v1_CombinedSupMats.pdf]

# Supplemental Materials

*Molecular Biology of the Cell*

Russo et al.

RUSSO ET AL., SUPPLEMENTAL FIGURES AND LEGENDS

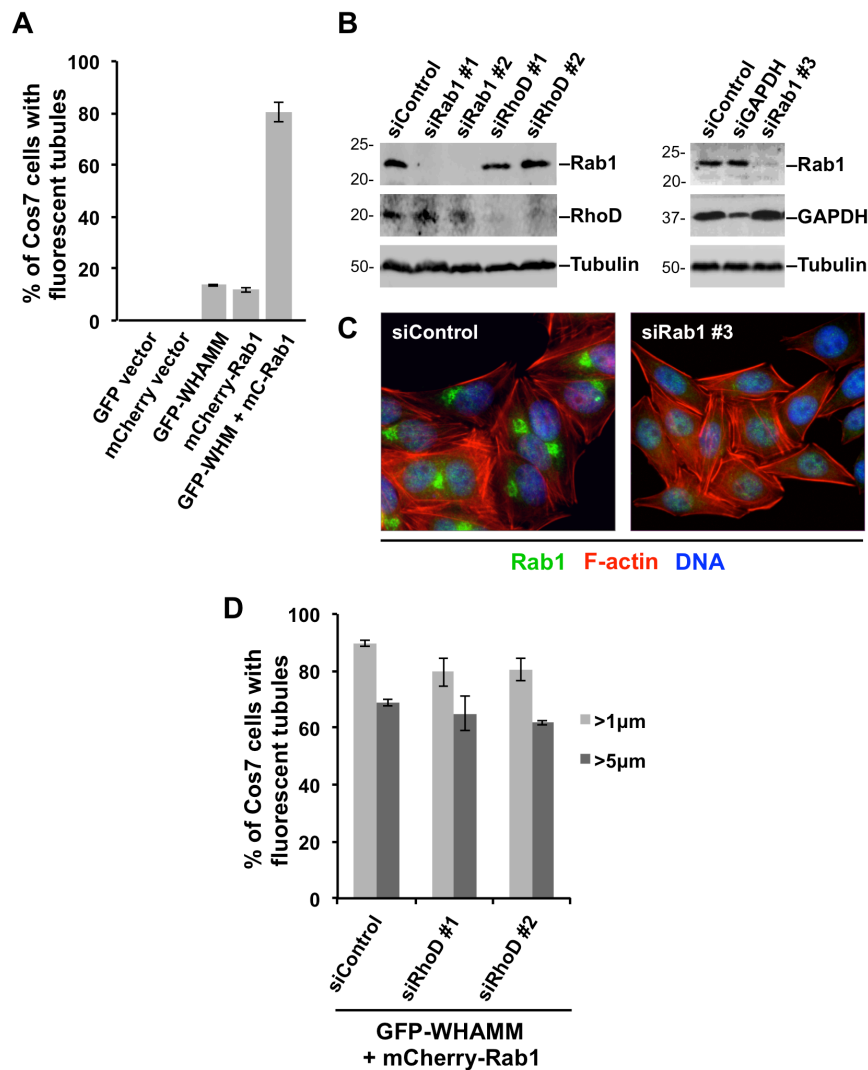

**Fig.S1. Membrane tubulation and expression of Rab1 and RhoD.**

A. Cos7 cells were transfected with plasmids encoding GFP- or mCherry-fusion proteins. The % of cells with fluorescent tubular structures  $>1 \mu\text{m}$  in length was quantified. Each bar represents the mean  $\pm$  SD from 3-4 experiments in which 50-75 cells were examined per experiment. Similar enhancement in tubulation of WHAMM-associated membranes upon co-expression with Rab1 was also observed in NIH3T3 cells and HFFs (not shown).

B. Cos7 cells treated with a control siRNA, GAPDH siRNA, independent pairs of siRNAs to Rab1a and Rab1b (#s 1-3), or independent siRNAs to RhoD (# 1-2) were subjected to SDS-PAGE and immunoblotted with antibodies to Rab1b, RhoD, GAPDH, and tubulin.

C. HeLa cells treated with a control siRNA or a pair of siRNAs to Rab1a and Rab1b were fixed and stained with anti-Rab1b antibodies, phalloidin to visualize F-actin, and DAPI to stain DNA.

D. Cos7 cells were co-transfected with plasmids encoding GFP-WHAMM plus mCherry-Rab1, and either a control siRNA or independent siRNAs to RhoD. The % of cells with fluorescent tubular structures  $>1 \mu\text{m}$  or  $>5 \mu\text{m}$  in length was quantified. Each bar represents the mean  $\pm$  SD from 3 experiments in which 55-80 cells were examined per experiment.

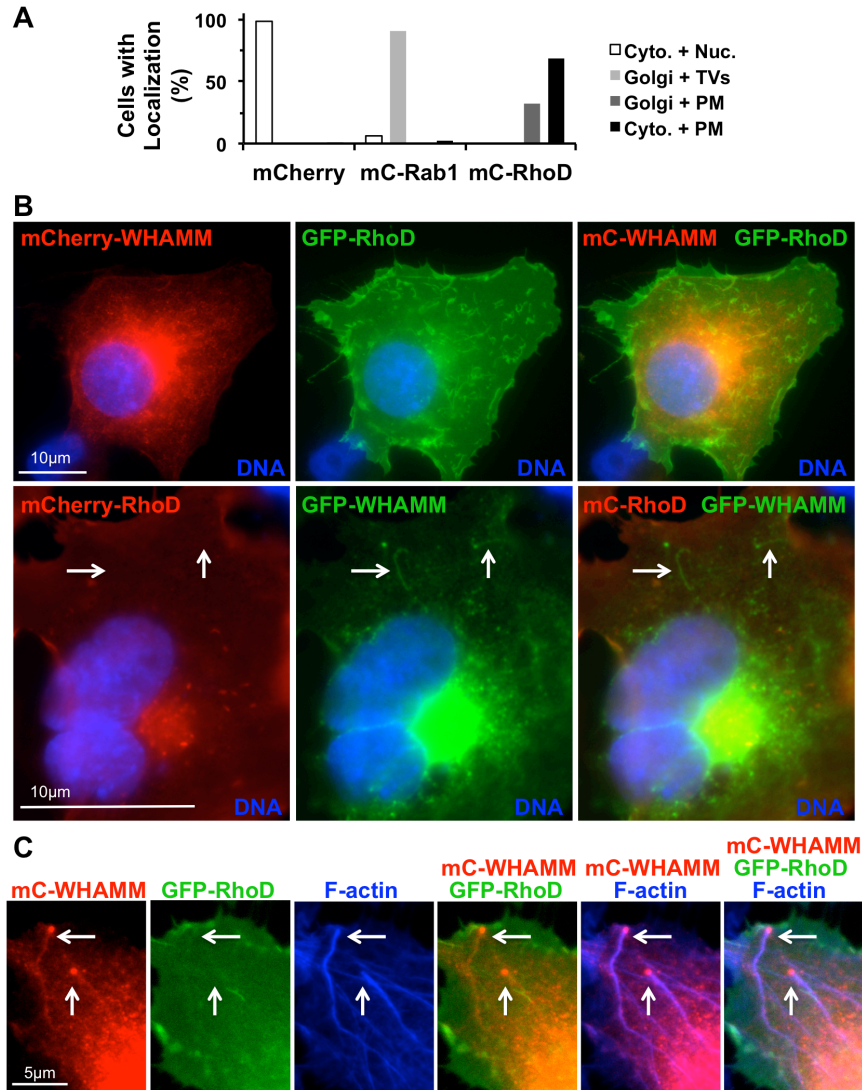

**Fig.S2. WHAMM and RhoD do not co-localize along tubulo-vesicular structures.**

A. Cos7 cells were transfected with plasmids encoding mCherry, mCherry-Rab1a, or mCherry-RhoD, fixed, stained with phalloidin and DAPI, and examined by fluorescence microscopy. The % of cells with cytosolic + nuclear (Cyto. + Nuc.), Golgi-like + tubulo-vesicular (Golgi + TVs), Golgi-like + plasma membrane (Golgi + PM), or cytosolic + plasma membrane (Cyto. + PM) mCherry fluorescence was then scored. 250-350 cells were examined for each construct.

B. Cos7 cells were co-transfected with plasmids encoding mCherry- and GFP-tagged versions of WHAMM or RhoD, fixed, and treated with DAPI to label DNA (blue). The top panels show a primarily cytosolic + plasma membrane localization for RhoD, while the bottom panels show a Golgi-like + plasma membrane localization for RhoD. Arrows highlight sites of WHAMM-associated tubulo-vesicular membranes that did not exhibit mCherry-RhoD localization.

C. Cos7 cells co-transfected as in part B were stained with phalloidin to detect actin filaments along WHAMM-associated tubulo-vesicular membranes. GFP-RhoD did not localize to these structures.

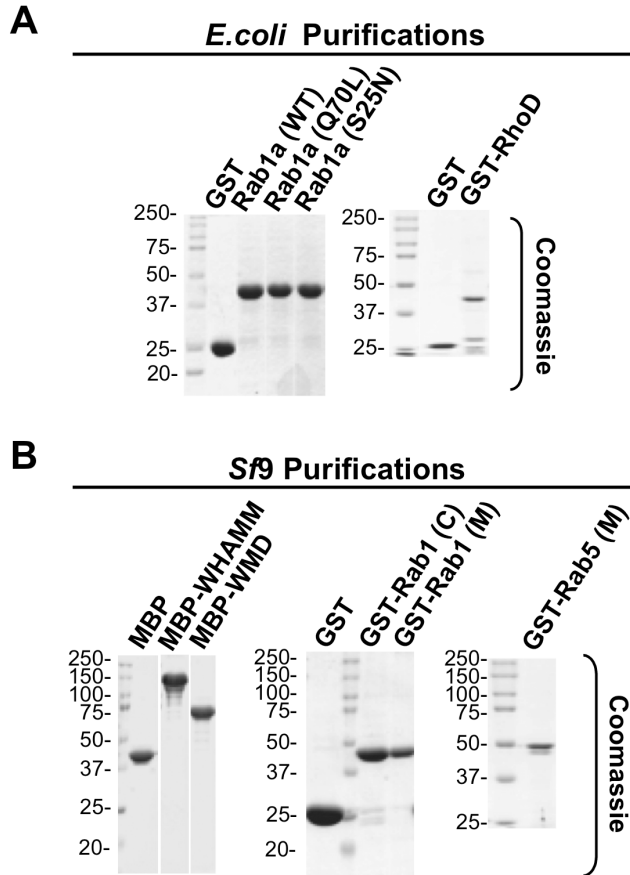

**Fig.S3. Purification of GST- and MBP-fusion proteins from *E.coli* or *Sf9* insect cells.**

A. Recombinant forms of GST, GST-RhoD, or GST-tagged versions of wild type (WT), constitutively active (Q70L), or inactive (S25N) Rab1a were expressed in *E.coli*, purified using glutathione affinity beads, subjected to SDS-PAGE, and stained with Coomassie blue.

B. Recombinant forms of MBP or MBP-tagged full-length WHAMM or the WMD were expressed in *Sf9* insect cells and purified using amylose affinity beads. Recombinant forms of GST, GST-Rab1a, or GST-Rab5 were also expressed in *Sf9* insect cells, and GST was purified from whole cell extracts using glutathione affinity beads. For GST-Rab1a and GST-Rab5, the cells were first fractionated into their membrane and cytosolic components. Membrane-extracted (M) and cytosolic (C) GST-fusions were then purified separately using glutathione affinity beads. All purified proteins were analyzed by SDS-PAGE and Coomassie blue staining.

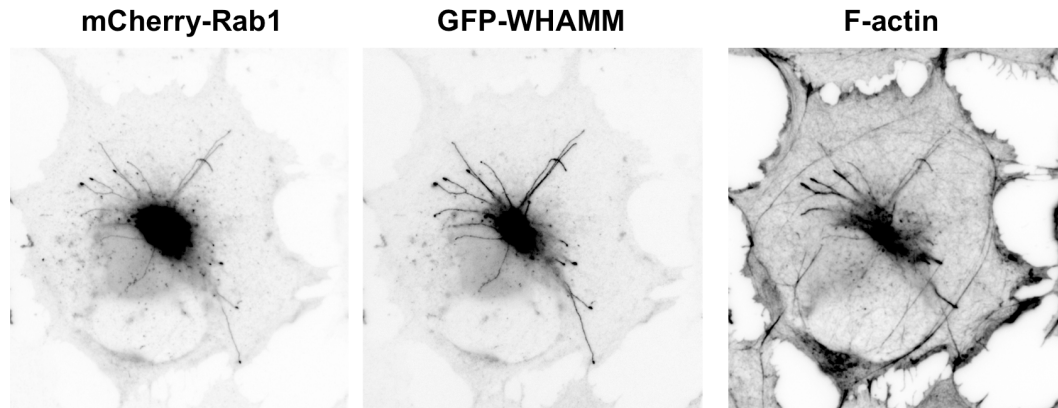

**Fig.S4. Actin filaments are present along tubulo-vesicular structures.**

Cos7 cells co-expressing mCherry-Rab1a and GFP-WHAMM were stained with phalloidin to label actin filaments. These inverted panels correspond to the colorized images in Fig.7A.
